# Supplementary material
Source: publisher figshare collection journal article supplement (https://karger.figshare.com/ndownloader/files/23522822)
Supplement: Supplementary file 1 [file 23522822]

Supplementary Table 2

Coagulation parameters of the prband and family members

| Family member | TT(S) | Fg(mg/dl) | PLT(x109/L) | FⅩ(%) | FⅩ:Ag*  (pg/mL) | FⅡ(%) | FⅤ(%) | FⅦ(%) | FⅧ(%) | FⅨ(%) | FⅪ(%) |
| --- | --- | --- | --- | --- | --- | --- | --- | --- | --- | --- | --- |
| Proband | 15.1 | 291 | 185 | 1.7 | 408.53 | 88.9 | 89.2 | 105 | 119.4 | 82.4 | 107.1 |
| Mother | 12.7 | 394 | 206 | 32.2 | 528.3 | 64.5 | 74.1 | 78.2 | 61.3 | 79.1 | 69 |
| Daughter | 15.0 | 303 | 235 | 48.3 | 490.3 | 95 | 102 | 87 | 83.3 | 98.2 | 90.8 |
| Grandson | 15.1 | 347 | 196 | 45.6 | 368.93 | 103 | 90 | 86.8 | 61.3 | 56 | 99.1 |
| Wife | 13.1 | 323 | 208 | 89.6 | 758.3 | 98.0 | 101.2 | 95.2 | 79.8 | 95.4 | 91.2 |
| Brother 1 | 14.3 | 297 | 223 | 1.3 | 465.47 | 99 | 100 | 85 | 61.3 | 60.3 | 93.8 |
| Brother 2 | 13.4 | 325 | 176 | 58.5 | 582.54 | 103.1 | 107 | 84.5 | 85.5 | 78 | 96.9 |
| Sister 1 | 14.2 | 312 | 324 | 118.3 | 717.13 | 114.6 | 116 | 105.2 | 110.4 | 96.8 | 105.9 |
| Sister 2 | 16.0 | 247 | 196 | 93．4 | 723.05 | 103.1 | 124.4 | 103.4 | 143.6 | 86.1 | 98.7 |
| Sister 3 | 13.8 | 347 | 147 | 65.9 | 552.21 | 98 | 100 | 100.3 | 148.8 | 98.2 | 93 |

*TT (thrombin time), Fg (fibrinogen), PLT(platelet count)Reference interval(n=40) :all the factors :50-150%； TT:10.3-16.6S; FIB:200-400mg/dl; PLT:125-335*109/L*
